# Supplementary material for: First-principles investigation of in-plane anisotropies in XYTe4 monolayers with X = Hf, Zr, Ti and Y = Si, Ge
Source: Royal Society of Chemistry journal article supplement (doi:10.1039/d2cp03628b), 2022-01-01
Supplement: d2cp03628b1.pdf [file d2cp03628b1.pdf]

## Supplemental materials

### **First-principles investigation of in-plane anisotropies in $XYTe_4$ monolayers with $X = \text{Hf, Zr, Ti}$ and $Y = \text{Si, Ge}$**

Degao Xu, Jianing Tan, Huamin Hu, Gang Ouyang\*

*Key Laboratory of Low-Dimensional Quantum Structures and Quantum Control of  
Ministry of Education, Key Laboratory for Matter Microstructure and Function of  
Hunan Province, Hunan Normal University, Changsha 410081, China*

\*Corresponding author. E-mail: gangouy@hunnu.edu.cn

**Figure S1**

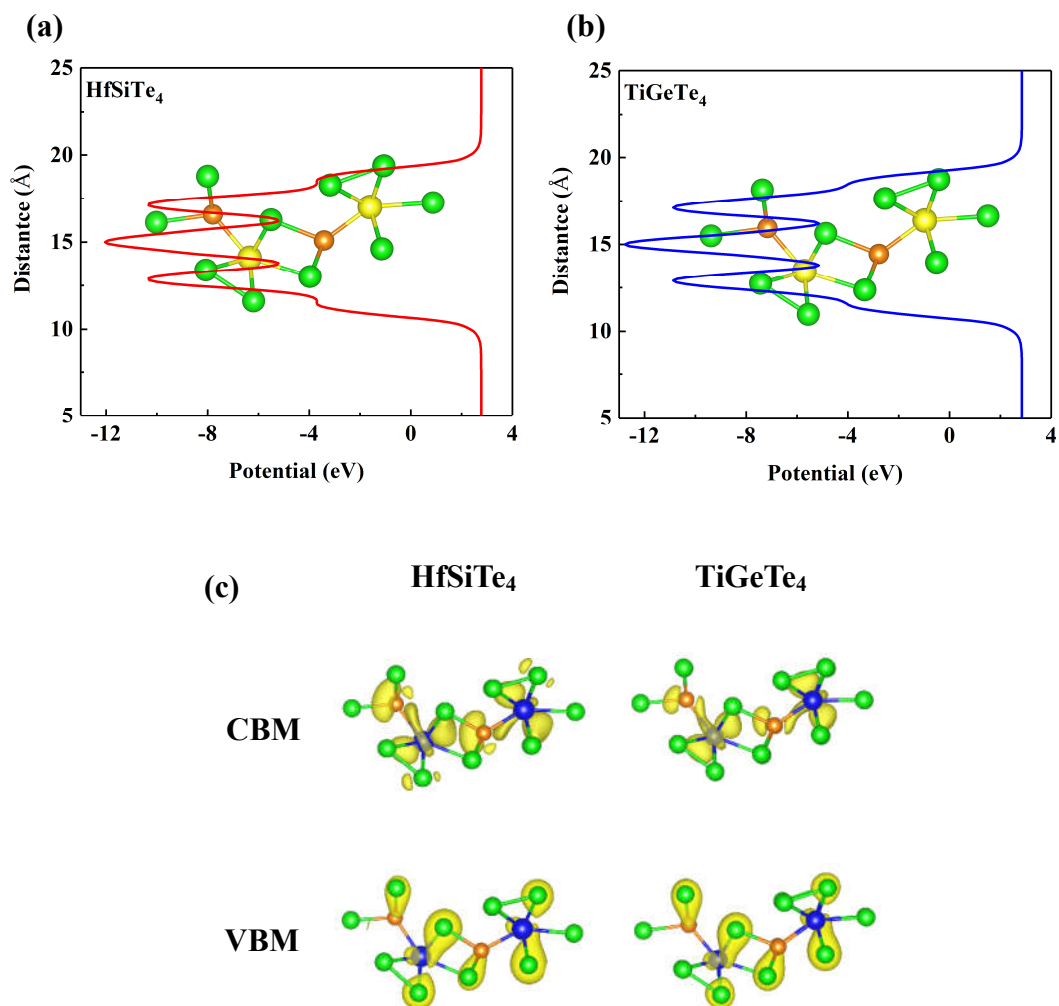

**Figure S1.** Potential average of (a) HfSiTe<sub>4</sub> and (b) TiGeTe<sub>4</sub> monolayer. (c) Band decomposed partial charge density of HfSiTe<sub>4</sub> and TiGeTe<sub>4</sub> at the  $\Gamma$ -centered of 0.002 e Å<sup>-3</sup> isosurface level. Transition metal atoms are turned blue for better visibility.

**Figure S2**

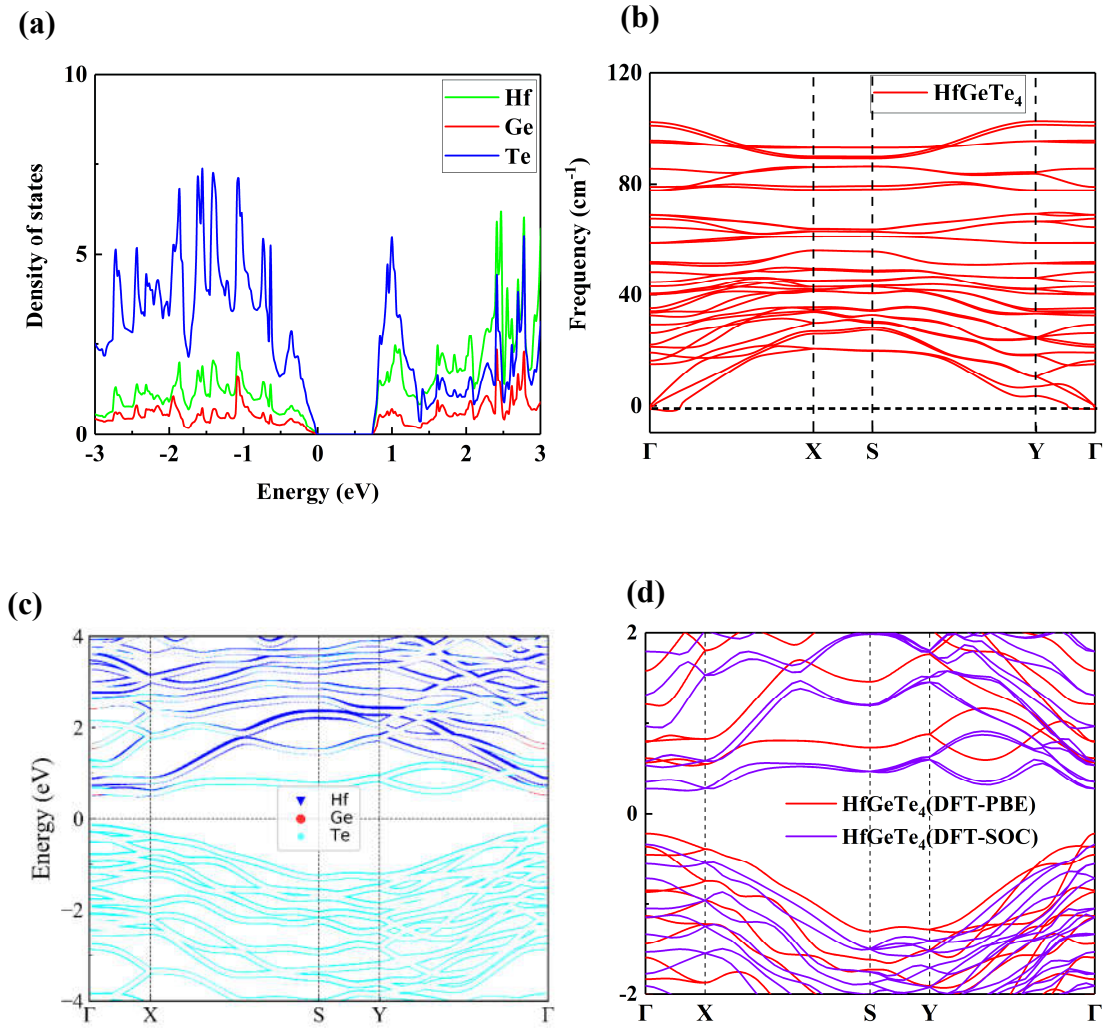

**Figure S2.** Projected density of states (in arb. unit) of (a) HfGeTe<sub>4</sub>, showing that the dominant states at the VBM are Te *p*-states and CBM are Hf *d*-states, respectively. (b) Phonon band dispersions of HfGeTe<sub>4</sub> monolayer. (c) Atom-dependent projected electronic band structures for HfGeTe<sub>4</sub> within the scheme of DFT-PBE. (d) The electronic band structures of HfGeTe<sub>4</sub> in the frame work of DFT-PBE and SOC.

**Figure S3**

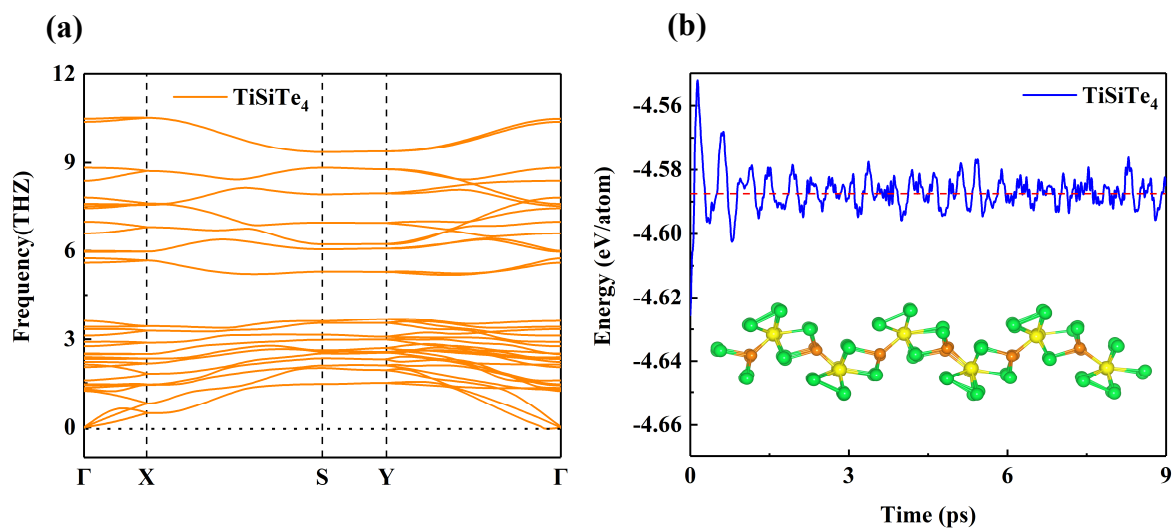

**Figure S3.** (a) Phonon band dispersions of TiSiTe<sub>4</sub> monolayer. (b) The variation of energy with respect to the time at 300 K for TiSiTe<sub>4</sub> monolayer, the insets show the snapshots of atomic configurations at the end of *ab initio* molecular dynamics (AIMD) simulations.

**Figure S4**

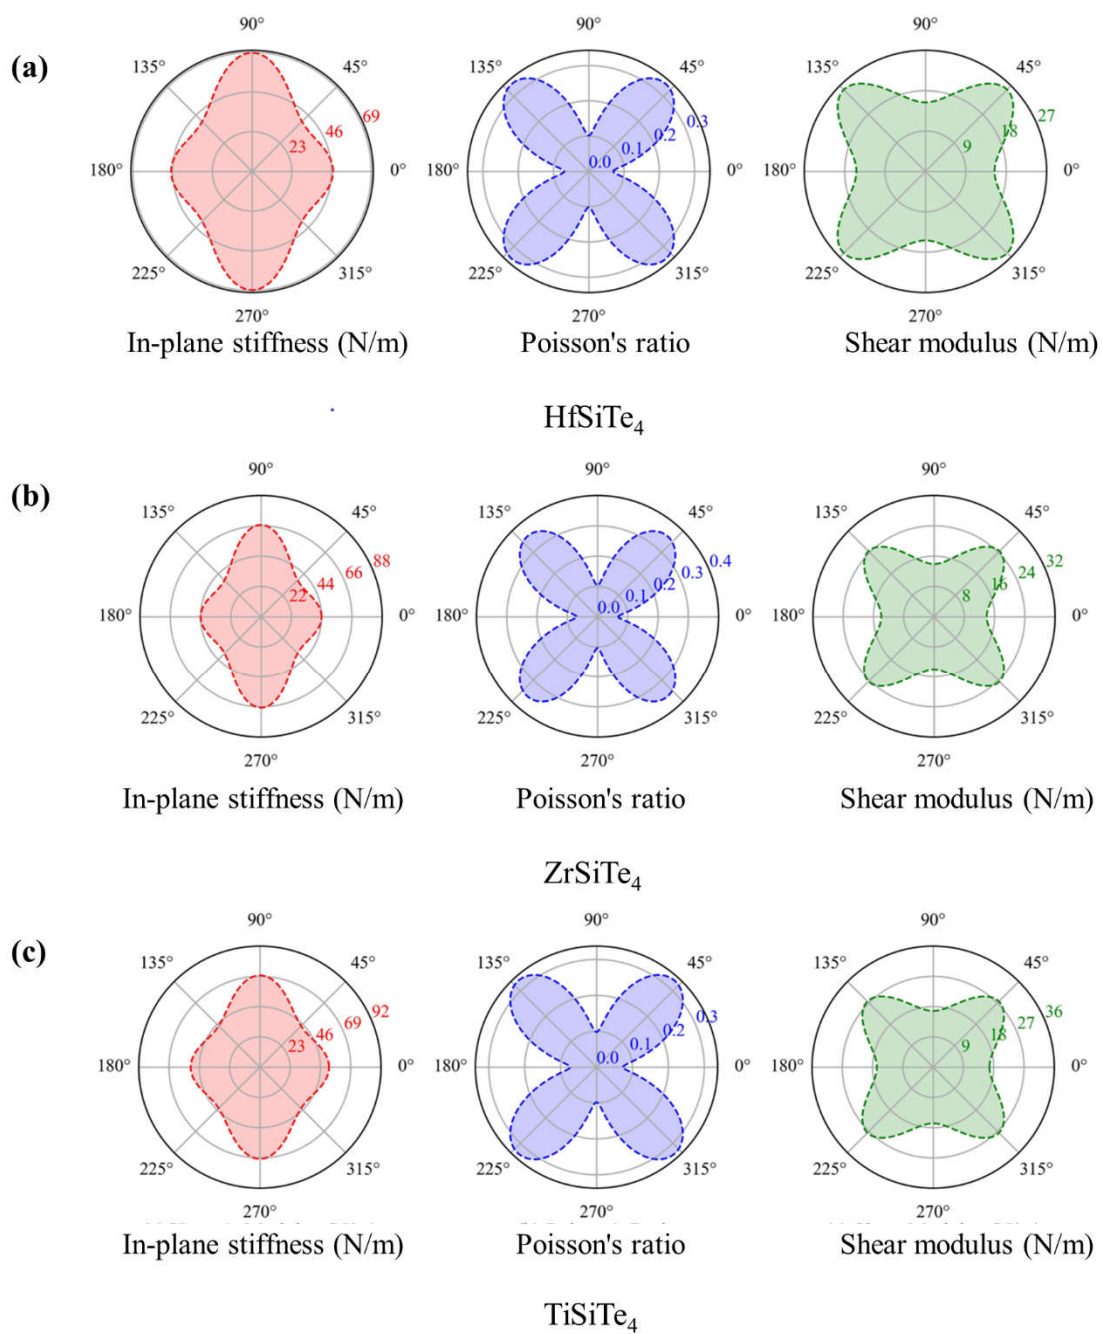

**Figure S4.** Orientation-dependent in-plane stiffness, Poisson's ratio and shear modulus of (a) HfSiTe<sub>4</sub>, (b) ZrSiTe<sub>4</sub>, and (c) TiSiTe<sub>4</sub> monolayers.

**Figure S5**

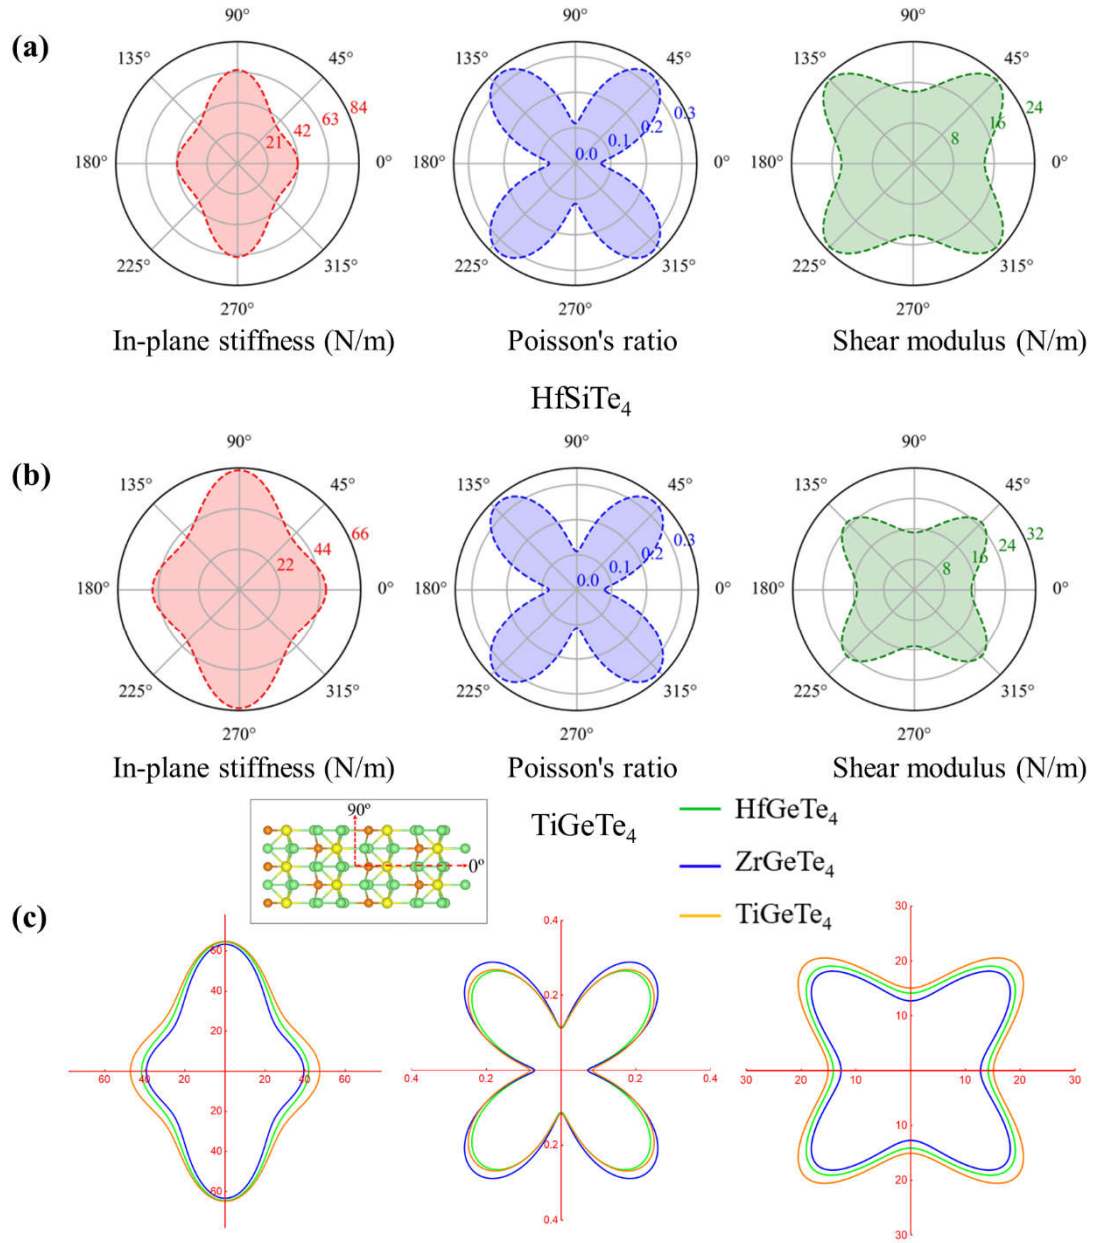

**Figure S5.** Orientation-dependent in-plane stiffness, Poisson's ratio and shear modulus of (a) HfGeTe<sub>4</sub> and (b) TiGeTe<sub>4</sub> monolayers. (c) Orientation-dependent linear-elastic constants of XGeTe<sub>4</sub> (X = Hf, Zr or Ti).

**Figure S6**

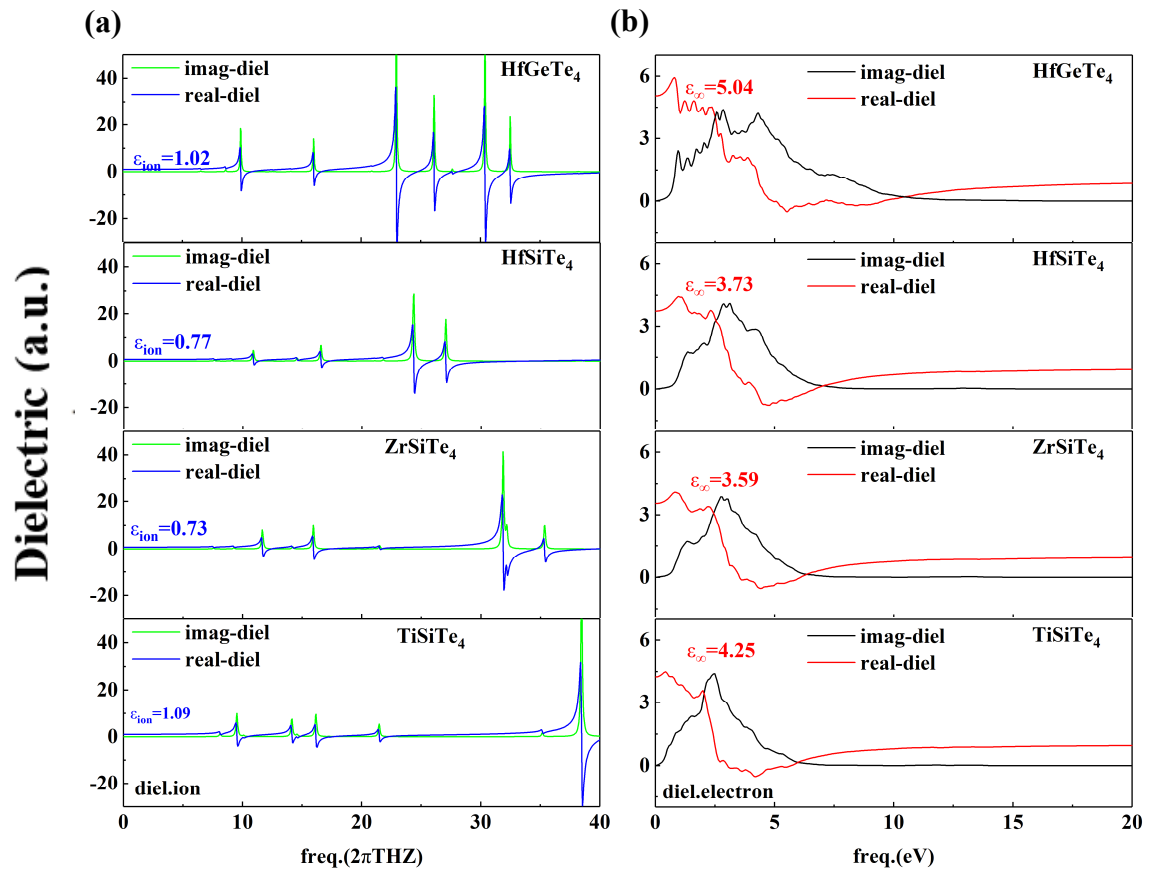

**Figure S6.** Imaginary and real parts of dielectric function of  $XYTe_4$  as a function of photon frequencies, ionic contribution on the left (a) and electron contribution on the right (b).
